# Supplementary material for: On the structure of high performance anticorrosive PMMA–siloxane–silica hybrid coatings
Source: Royal Society of Chemistry journal article supplement (doi:10.1039/c5ra20885h), 2015-01-01
Supplement: c5ra20885h1.pdf [file c5ra20885h1.pdf]

## Supplementary Information

On the structure of high performance anticorrosive PMMA-Siloxane-Silica hybrid  
coatings

Fábio C. dos Santos<sup>a</sup>, Samarah V. Harb<sup>a</sup>, Marie-Joëlle Menu<sup>b</sup>, Viviane Turq<sup>b</sup>, Sandra H. Pulcinelli<sup>a</sup>, Celso V.  
Santilli<sup>a</sup>, Peter Hammer<sup>a\*</sup>

<sup>a</sup> Instituto de Química, UNESP-Univ Estadual Paulista,  
14800-060 Araraquara, SP, Brazil

<sup>b</sup> Université Paul Sabatier - Toulouse III, 31062  
Toulouse Cedex 9, France

Corresponding Author

To whom correspondence should be addressed.

\*Prof. Dr. Peter Hammer, E-mail: peter@iq.unesp.br

### Hydrolysis

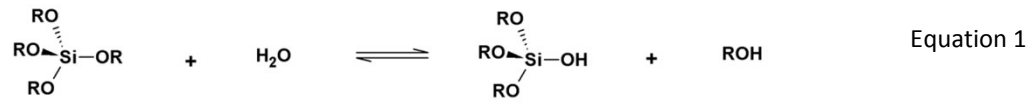

### Condensation

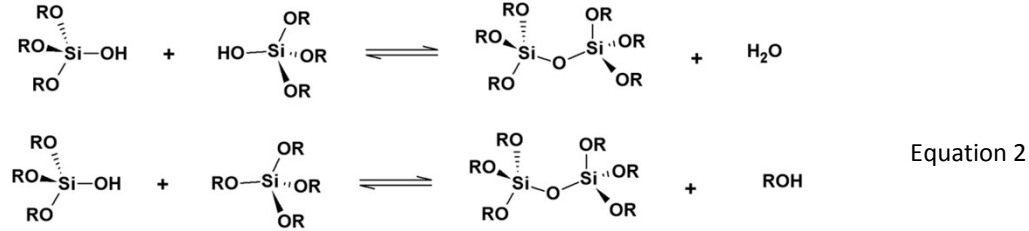

**Scheme S1.** Hydrolysis and condensation reactions of the sol-gel process.

### Method of the SAXS analysis

Assuming an isotropic system of a set isolated silica-siloxane particles nanoparticles embedded in a homogeneous PMMA matrix, with a spatial correlation evidenced by the maximum in the ME05, the experimental SAXS intensity was fitted by the semi-empirical function proposed by Beaucage:<sup>17</sup>

$$I(q) = [G \exp(-q^2 R_g^2/3) + B[[\text{erf}(q R_g \sqrt{6})]^3/q]^\alpha] S(q) \quad (1)$$

where  $R_g$  is the Guinier radius of gyration of the isolated nanoparticles. For a two-electron density model,  $G$  and  $B$  are adjustable parameters given by  $G = N (\rho_p - \rho_m)^2 V_2$  and  $B = 2\pi (\rho_p - \rho_m)^2 A$ , where  $N$  is the number of particles per unit volume,  $V$  is the particle volume,  $A$  is the interface area between the particles and the matrix and  $(\rho_p$  and  $\rho_m)$  are average electron densities of the particles and the matrix, respectively.

In Eq. (1), the asymptotic Guinier and Porod laws are merged. The  $\text{erf}$  function acts as a low  $q$  cut-off that brings to zero the Porod law contribution at a point depending on the  $R_g$  parameter. For a system with a diluted set of nanoparticles the interference effects of intensity scattered by each particle is absent and structure function is equal to unity  $S(q) = 1$ .

In the case of semi-diluted the interference effect was take accounts considering the structure-function  $S(q)$  for spherical particles, in which the only correlation is a hard sphere interaction, is given by<sup>17</sup>:

$$S(q) = 1/(1 + k \theta) \quad (2)$$

The packing factor  $k$  describes the degree of correlation that measures the number of nearest neighbour particles and is equivalent to  $8V/V_0$  where  $V$  is the average "hard-core" volume and  $V_0$  is the average available volume for each sphere. The form function,  $\theta$ , depends on the average inter-particle distance,  $d$ , as follows:

$$\theta(q) = 3[\sin(qd) - qd \cos(qd)]/(qd)^3 \quad (3)$$

where  $d$  is the average distance between nanoparticles. Equation (3) was derived for systems of identical spatially correlated nanoparticles, but it is usually also applied, to systems of correlated particles with a narrow or moderate width of size distribution.

The experimental SAXS curves were fitted with equation (1) using a no linear least square procedure, leading to the continuous lines displayed in Fig. 2.

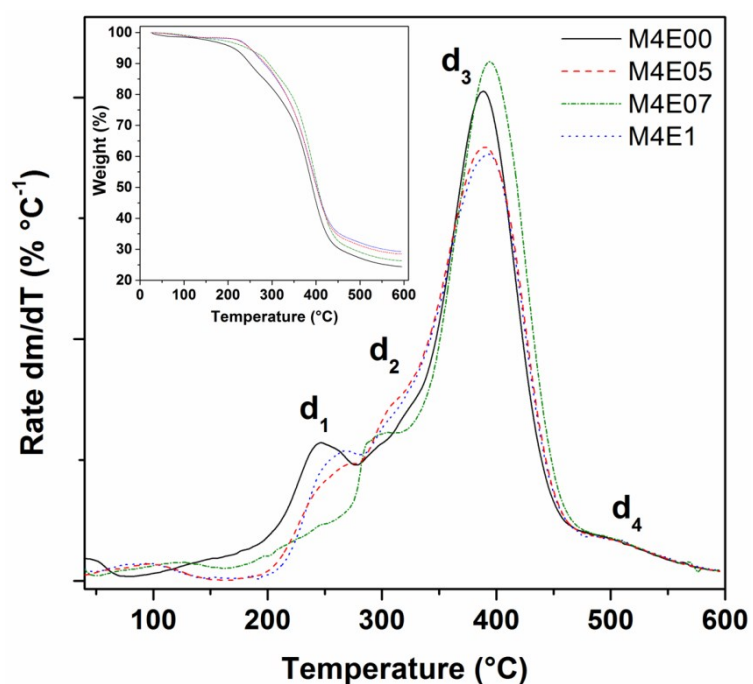

**Figure S1.** DTG and TG (inset) curves of PMMA-SS hybrids, prepared at EtOH/H<sub>2</sub>O molar ratios ranging from 0.0 to 1.0, indicate the existence of four degradation stages: rupture of the head-to-head segments at ~250 °C ( $d_1$ ) and to unsaturated chain ends at ~310 °C ( $d_2$ ), random scissions of the polymer chains ~400 °C ( $d_3$ ) and partial dehydration of residual silanol groups ~480 °C ( $d_4$ ).

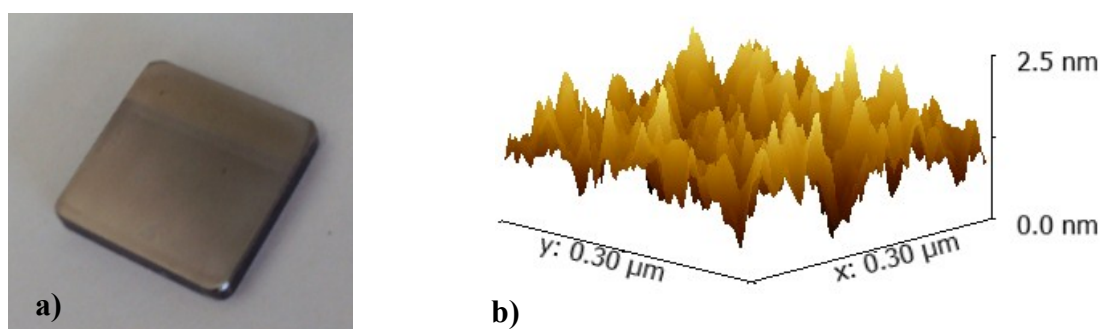

**Figure S2.** a) Representative image of the PMMA-SS hybrid coated carbon steel, and b) AFM topography of the flat and featureless surface of sample M4E05.

**Table S1.** Critical loads observed for the scratch events for hybrid films prepared with different EtOH/H<sub>2</sub>O ratios.

| Event / Sample      | Critical loads (mN) |              |              |              |              |
|---------------------|---------------------|--------------|--------------|--------------|--------------|
|                     | M4E00               | M4E01        | M4E02        | M4E05        | M4E1         |
| Plastic deformation | 1.7 ±0.6            | 0.4±0.1      | 0.4±0.1      | 1.0 ±0.9     | 0.3 ±0.1     |
| Initial cracks      | 21.8 ±0.6           | 19.5±0.5     | 17.5±1.0     | 19.2 ±0.2    | 17.5 ±1.2    |
| Film delamination   | not observed        | Not observed | not observed | not observed | not observed |

**Table S2.** Parameters of the electrical equivalent circuit for sample M4E05 after 1 day exposure and M4E02 after 1 day and 196 days immersion in neutral 3.5% NaCl solution.

| Sample                                            | M4E05 (1day)          |        | M4E02 (1day)          |        | M4E02 (196 days)      |        |
|---------------------------------------------------|-----------------------|--------|-----------------------|--------|-----------------------|--------|
| $\chi^2$                                          | $1.9 \times 10^{-4}$  |        | $0.63 \times 10^{-3}$ |        | $1.6 \times 10^{-3}$  |        |
| $R_1 (\Omega \text{ cm}^2)$                       | $1.63 \times 10^7$    | (5.80) | $2.37 \times 10^7$    | (13.9) | $2.05 \times 10^7$    | (7.87) |
| $\text{CPE}_1 (\text{F cm}^{-2} \text{ s}^{n-1})$ | $4.50 \times 10^{-9}$ | (0.50) | $2.08 \times 10^{-9}$ | (1.07) | $2.71 \times 10^{-9}$ | (1.70) |
| $n_1$                                             | 0.97                  | (0.10) | 0.97                  | (0.12) | 0.95                  | (0.22) |
| $R_2 (\Omega \text{ cm}^2)$                       | $1.68 \times 10^9$    | (1.00) | $4.59 \times 10^9$    | (5.25) | $7.26 \times 10^8$    | (1.78) |
| $\text{CPE}_2 (\text{F cm}^{-2} \text{ s}^{n-1})$ | $2.3 \times 10^{-9}$  | (0.86) | $2.19 \times 10^{-9}$ | (0.75) | $3.69 \times 10^{-9}$ | (1.29) |
| $n_2$                                             | 0.69                  | (0.39) | 0.56                  | (0.92) | 0.69                  | (1.04) |

Values between brackets represent the fitting errors (%).
